1 **Physiological and genetic analysis of tomato from two**  
2 **cultivars differing in potassium deficiency resistance**

3 Xi Wang<sup>1</sup>, Honghui Zhang<sup>1</sup>, Tianlai Li<sup>1,2</sup>, Xin Liu<sup>1,2\*</sup>, Jing Jiang<sup>1,2,\*</sup>

4 *1College of Horticulture, Shenyang Agricultural University, Shenyang, Liaoning, 110866 China;*

5 *2Key Laboratory of Protected Horticulture of Education Ministry, Shenyang, Liaoning, 110866*

6 *China*

1 **Genetic analysis of tomato in low K<sup>+</sup>**

2 Keywords: Tomato; LK resistance; Genetic inheritance; Antioxidant ability; BSA-seq;

3 \* Corresponding author:

4 Jing Jiang: [jiangj\\_syau@syau.edu.cn](mailto:jiangj_syau@syau.edu.cn); (8624)-88487143; Fax number: (8624)-8848 7054

5 Xin Liu: [116029050@qq.com](mailto:116029050@qq.com)

# 1 **Physiological and genetic analysis of tomato from two** 2 **cultivars differing in potassium deficiency resistance**

## 3 **Abstract**

4 Potassium (K) is one of the essential nutrients for tomato. Potassium deficiency will  
5 limit tomato growth and yield. So improving the low-K<sup>+</sup> (LK) resistance of tomato  
6 seems important. Two tomato cultivars (JZ18 and JZ34) differing in LK resistance  
7 were obtained to analyze the plant demonstration difference under LK treatment.  
8 According to the results, JZ34 showed lower accumulation of ROS, less membrane  
9 damage and higher antioxidant enzyme activity after LK treatment. Besides, JZ34  
10 also keeps higher K<sup>+</sup>/Na<sup>+</sup> content, higher Ca<sup>2+</sup> and Mg<sup>2+</sup> content than JZ18 in both  
11 shoots and roots. Our genetic analysis revealed that the two  
12 additive-dominance-epistasis major genes plus additive-dominance polygene genetic  
13 model (E-1) was the optimum model associated with LK resistance based on root trait.  
14 The major QTL intervals were finally obtained by the bulked segregant sequencing  
15 (BSA-seq) analysis, which were 2.38 Mb at the end of chromosome 4 and 1.38 Mb at  
16 the chromosome 6. This is consistent with the analysis of the genetic model. A total of  
17 8 genes were selected in the two candidate regions, which exhibited close related to  
18 ion and antioxidant signaling. These findings provided the inheritance pattern and  
19 foundation for further molecular mechanisms study of tomato LK resistance.

20 **Keywords:** Tomato; LK resistance; Genetic inheritance; Antioxidant ability

## 21 **1. Introduction**

22 Potassium is the most abundant cation in plant cells, and plays crucial roles in  
23 diverse physiological processes during plant growth and development, such as  
24 enzyme activation, electrical neutralization, and membrane potential maintenance  
25 (Wang and Wu 2017). While the K<sup>+</sup> concentration in the soil solution may vary  
26 widely from 0.01 to 20 mM, plant cells maintain a relatively constant concentration of  
27 80-100 mM in the cytoplasm (Rodríguez-Navarro 2000). Compared with the higher  
28 concentration of K<sup>+</sup> in cells, the concentration of K<sup>+</sup> in soil was lower. The roots of  
29 plants are in direct contact with the soil, so the LK signal is initially sensed by root  
30 cells, especially root epidermal cells and root hair cells. K<sup>+</sup> deficiency signal is first  
31 sensed by the plasma membrane of root epidermal cells, and then transmitted to the  
32 cytoplasm, causing a series of physiological and biochemical processes in response to  
33 LK stress (Song *et al.* 2018).

34 In response to LK, plants affect root growth and root architecture, such as  
35 inhibiting the growth of taproot and stimulating root hair elongation (Cao *et al.* 1993;  
36 Tsay *et al.* 2011). Using some root traits as an evaluation standard, some genes or  
37 quantitative trait loci (QTLs) related to LK resistance were discovered in rice  
38 (Koyama *et al.* 2001; Lin *et al.* 2004; Pandit *et al.* 2010), wheat (Kong *et al.* 2013)  
39 and *A. thaliana* (Xu *et al.* 2006; Wang *et al.* 2010; Li *et al.* 2017; Du *et al.* 2019).  
40 Protein kinase CIPK23, interaction with the K<sup>+</sup> channel AKT1, was map-based cloned  
41 by observing the different root phenotype of mutant and wild type under LK condition  
42 in *A. thaliana* (Xu *et al.* 2006). Quantitative traits loci (QTLs) for root length and root  
43 dry weight in rice were detected using a doubled haploid population under LK  
44 condition (Fang *et al.* 2015).

45 Tomato have a high demand for K<sup>+</sup> as the major horticulture crops. LK  
46 conditions would result in the serious decline of production and quality in tomato.  
47 However, it has been rare studies in tomato to study the mapping of K<sup>+</sup> deficiency  
48 resistance gene. Only few early reports showed the K<sup>+</sup> utilization efficiency had low  
49 heritability, and were controlled by polygene and affected by additive effect,  
50 dominance effect and epistasis effect in tomato (Gabelman and Loughman 1987).  
51 Thus, it is important for investigations of tomato breeding of LK resistance to learn  
52 the inheritance models of tomato in response to LK stress.

53 In the molecular signal network response to LK stress, some signaling molecules  
54 have been proposed to be involved in, including ion, ROS signal and so on (Wang and  
55 Wu 2013). The LK stress firstly affects the plasma membrane, activates the Ca<sup>2+</sup>  
56 channel, and initiates the LK signal transduction pathway (Behera *et al.* 2016). When  
57 plants suffer from LK stress, the Ca<sup>2+</sup> sensor CBL can interact with the protein kinase  
58 CIPK to form a complex to activate the high-affinity K<sup>+</sup> transporter or K<sup>+</sup> channel,  
59 thereby responding to the LK stress (Xu *et al.* 2006; Dong *et al.* 2021). Similar to  
60 magnesium-calcium, an antagonistic relationship has also been described for  
61 magnesium-potassium (Senbayram *et al.* 2015). High levels of external K<sup>+</sup> result in  
62 reduced uptake of Mg<sup>2+</sup>, and an effect of high Mg<sup>2+</sup> on K<sup>+</sup> uptake has also been  
63 reported in Arabidopsis (Fageria 2001; Ding *et al.* 2010; Mogami *et al.* 2015). Early  
64 study suggested that at least two mechanisms are involved in Mg<sup>2+</sup>-uptake through the  
65 plasma membrane, one of which allows for uptake of K<sup>+</sup> and Ca<sup>2+</sup> (Shabala and  
66 Hariadi 2005). In addition, facilitating osmotic adjustment and maintenance of high  
67 K<sup>+</sup>/Na<sup>+</sup> ratios in the cytosol of plants is essential for salt and LK tolerance. It  
68 involves a network of transport processes that regulates uptake, extrusion through the

69 plasma membrane, compartmentation of salts into cell vacuoles and recirculation of  
70 ions through the plant organs (Apse and Blumwald 2007; Pardo and Rubio 2011;  
71 Asins *et al.* 2013). Moreover plants will produce a large amount of reactive oxygen  
72 species (ROS) under LK stress, which are important signaling molecules in cells.  
73 Studies have shown that ROS are not only involved in LK signaling, but also are  
74 induced  $\text{Ca}^{2+}$  signaling to convey HAK5  $\text{K}^+$  transporter induction (Mittler 2002; R  
75 and Schachtman 2004; Wang *et al.* 2021). How these ions and ROS signals in  
76 response to LK are transmitted in tomato is still unknown, which requires a  
77 comprehensive study to explore.

78 In our research, two tomato varieties with different tolerance to LK, LK-sensitive  
79 inbred line ‘JZ18’ and LK-resistant inbred line ‘JZ34’ were used to determine the  
80 difference of ion and ROS signaling in response to LK stress. Next, the length of roots  
81 values of six generations were ( $P_1$ ,  $P_2$ ,  $F_1$ ,  $B_1$ ,  $B_2$  and  $F_2$ ) measured under LK stress,  
82 JZ18 and JZ34 lines as parents, and major gene and polygene genetic models were  
83 acquired. The major-effect QTLs was further confirmed by BSA-seq, which led to  
84 better understand the molecular mechanism of  $\text{K}^+$  deficiency resistance in tomato  
85 seedlings. These results may provide a basic theory for further key signaling pathways  
86 and QTL analysis for LK resistance in tomato.

## 87 **2. Materials and methods**

### 88 *2.1 Plant materials and growth condition*

89 Through observation of 9 tomato materials with different stem diameter, root  
90 activity, root dry weight, root fresh weight and yield under LK condition in the 2010,  
91 two lines were selected from them, JZ18 ( $P_1$ ), with LK susceptibility, and JZ34 ( $P_2$ ),  
92 with high resistance to LK (Zhao *et al.* 2018). In autumn 2017, JZ18 ( $P_1$ ) and JZ34 ( $P_2$ )  
93 as the parents were crossed to construct  $F_1$  populations in experimental field of  
94 Shenyang Agricultural University. In autumn 2018, the  $F_2$  generation was produced  
95 by strict self-pollination of  $F_1$  and  $BC_1P_1$  and  $BC_1P_2$  generations were obtained using  
96  $F_1$  and two parents to backcross.

97 The seed of six generations were sterilized in culture dish to germinate and were  
98 transferred in plug plate after 3 days. All the seedlings were provided with the same  
99 growth conditions. The LK condition was generated by hydroponics method (Zhao *et al.*  
100 *et al.* 2018). The  $\text{K}^+$  concentration of control solution was 4 mM and LK solution was  
101 0.5 mM. After LK stress for 21 days, the samples of the tomato seedlings were taken  
102 to obtain the pictures and determined the chlorophyll, relative water content (RWC),

103 biomass, and proline contents. Three biological replicates were conducted for each  
104 treatment.

## 105 *2.2 Observation and determination of root morphology*

106 The root materials were obtained after LK stress treatment for 7 days. The root  
107 traits of the tomato seedlings were scanned by the Epson Scan 2 and analyzed  
108 WinRHIZO software, including root length, root area and root fork. The phenotypic  
109 data of root length, including maximum, minimum, mean, standard deviation and  
110 variance, were obtained by Excel 2010. The CV (%) was evaluated by formulas, (CV:  
111 coefficient of variation,  $\sigma$ : standard deviation,  $\mu$ : average).

## 112 *2.3 ROS and ion content measurement*

113 The JZ18 and JZ34 plants, after LK stress for 0, 1, 3 and 7 days and these plants  
114 were used for the measurements. Three biological replicates were conducted for each  
115 treatment. The content of  $H_2O_2$  and  $O_2^-$  was detected using the Micro Hydrogen  
116 Peroxide( $H_2O_2$ ) Assay Kit (Solarbio Science, China). The malondialdehyde (MDA)  
117 content, the activities of super oxide dismutase (SOD), peroxidase (POD), catalase  
118 (CAT), and ascorbate peroxidase (APX) and the  $K^+$ ,  $Na^+$ ,  $Ca^{2+}$  and  $Mg^{2+}$  content were  
119 determined (Zhao *et al.* 2017).

## 120 *2.4 Joint segregation analysis*

121 The mix major gene plus polygene genetic models were obtained by the joint  
122 segregation analysis method using the phenotypic values of six generations (Gai and  
123 Wang 1998). The 24 types inheritance models were classified for five groups,  
124 including one major gene model (A), two major genes model (B), polygene model (C),  
125 one major gene plus polygene model (D) and two major genes plus polygene model  
126 (E). The two models with smallest values of AIC were selected as candidate models.  
127 A series of goodness-of-fit test, including the homogeneity test ( $U_2^1$ ,  $U_2^2$  and  $U_2^3$ ),  
128 Smirnov test ( $nW^2$ ) and Kolmogorov test ( $D_n$ ), were used to estimate the candidate  
129 models. The model with the smallest number of significance was chosen as the  
130 best-fit model. Finally, the first-and second-order parameters of the best model were  
131 acquired.

## 132 *2.5 BSA-seq and linkage mapping analysis*

133 For bulked segregant analysis (BSA), two extreme pools were selected from the  
134  $F_2$  population (650 individuals): a LK resistance pool (R-pool, 28  $F_2$  individuals  
135 showing 5000 cm root length) and a LK sensitive pool (S-pool, 28  $F_2$  individuals

136 showing 800 cm root length). Total DNA was extracted from the parental lines and  
137 extreme pools, and used for library construction for short-insert sequencing. Qualified  
138 DNA samples are broken into 400bp fragments by the fragmentation kit for library  
139 construction. The DNA fragments are subjected to end repair, polyA tailing,  
140 sequencing adapters, purification, PCR amplification and other steps to complete the  
141 entire library preparation. After the library is constructed, use Qubit2.0 for  
142 preliminary quantification, and then use the Agilent BioAnalyzer 2100 to detect the  
143 length of the insert in the library. After the length meets the expectation, use qPCR to  
144 accurately quantify the effective concentration of the library to ensure the quality of  
145 the library. After the library is qualified, it enters the superior sequencing stage. The  
146 sequencing platform is Illumina Hiseq 4000, and the sequencing mode is PE150. And  
147 then, we will perform quality control on the offline data, and get CleanData after  
148 removing low-quality sequences and sequencing adapter sequences. Next, compare  
149 these CleanData data with the reference genome  
150 ([https://www.solgenomics.net/organism/Solanum\\_lycopersicum/genome](https://www.solgenomics.net/organism/Solanum_lycopersicum/genome)), and  
151 perform SNP and InDel detection and annotation based on the comparison results.  
152 Next, calculate the SNP-index and the difference of the offspring mixed pools, select  
153 the regions with very significant differences in SNP-index of the two offspring mixed  
154 pools, and locate the target trait regions on the *Solanum lycopersicum*'s chromosomes.

### 155 **3. Results**

#### 156 *3.1 Phenotypic characterization of LK tolerance in JZ18 and JZ34*

157 The two self-bred lines of tomato, JZ18 (LK susceptible lines), JZ34 (LK  
158 resistant lines), grown on normal conditions were transferred to LK conditions for  
159 another 7 days. The JZ18 displayed root growth inhibition under LK conditions for 7  
160 days(**Fig. 1 A**). And JZ18 plants had the smaller whole root area , shorter root length  
161 and lower root fork under LK stress. (**Fig. 1 B-D**). However, JZ34 had a more stable  
162 root system under LK stress. These results demonstrate that LK stress restrained the  
163 root growth of the JZ18 plants, while almost no effect on JZ34 plants(**Fig. 1 E**).

164 In addition, when JZ18 and JZ34 plants were transferred to LK conditions for 21  
165 days, the leaves turned yellow-green color in the JZ18, which is a typical K<sup>+</sup>  
166 deficiency phenotype, while the leaves growth of JZ34 remained normal green color  
167 (**Fig. 2 A**). As showed in **Fig. 2 B-C**, pigment measurement results indicated that the  
168 contents of chlorophyll a, chlorophyll b and carotenoids in JZ18 and JZ34 were  
169 significantly (P value < 0.05) lower under LK stress compared with those in control

170 (CK), while the degree of decrease in JZ34 was smaller than JZ18 (**Fig. 2 B-D**).  
171 Similar results were observed in relative water content and shoot biomass (**Fig. 2 E-F**).  
172 After exposure to LK stress, the proline content of JZ34 plants was increased  
173 significantly (**Fig. 2 G**). These results suggesting that the LK tolerance of JZ34 plants  
174 was higher than JZ18 plants through maintaining normal root and leaf growth.

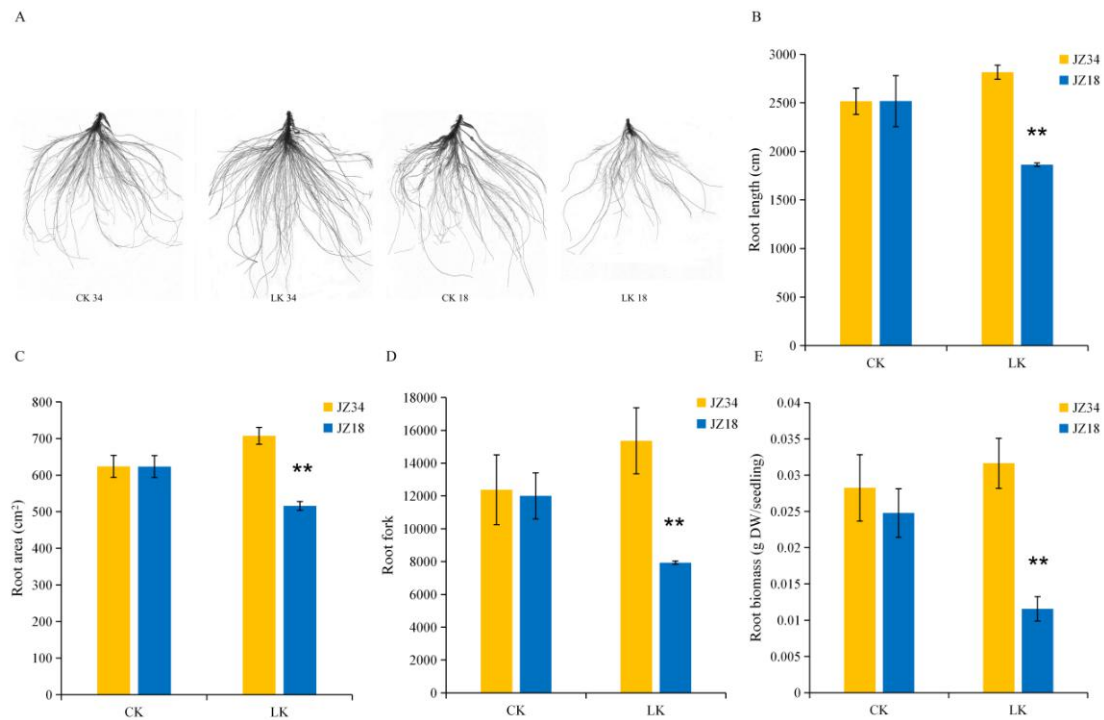

**Fig. 1** Roots phenotype of JZ18 and JZ34 under control K<sup>+</sup> (4 mM) and LK (0.5 mM) stress conditions for 7 days. (A) Root phenotype, (B) Root length, (C) Root area, (D) Root fork and (E) Root biomass in JZ18 and JZ34 plants under control and LK stress conditions for 7 days. The presented data are the means  $\pm$  SE of three independent experiments (n=12). Asterisks indicate significant difference between JZ18 and JZ34 plants (\*P < 0.05, \*\*P < 0.01).



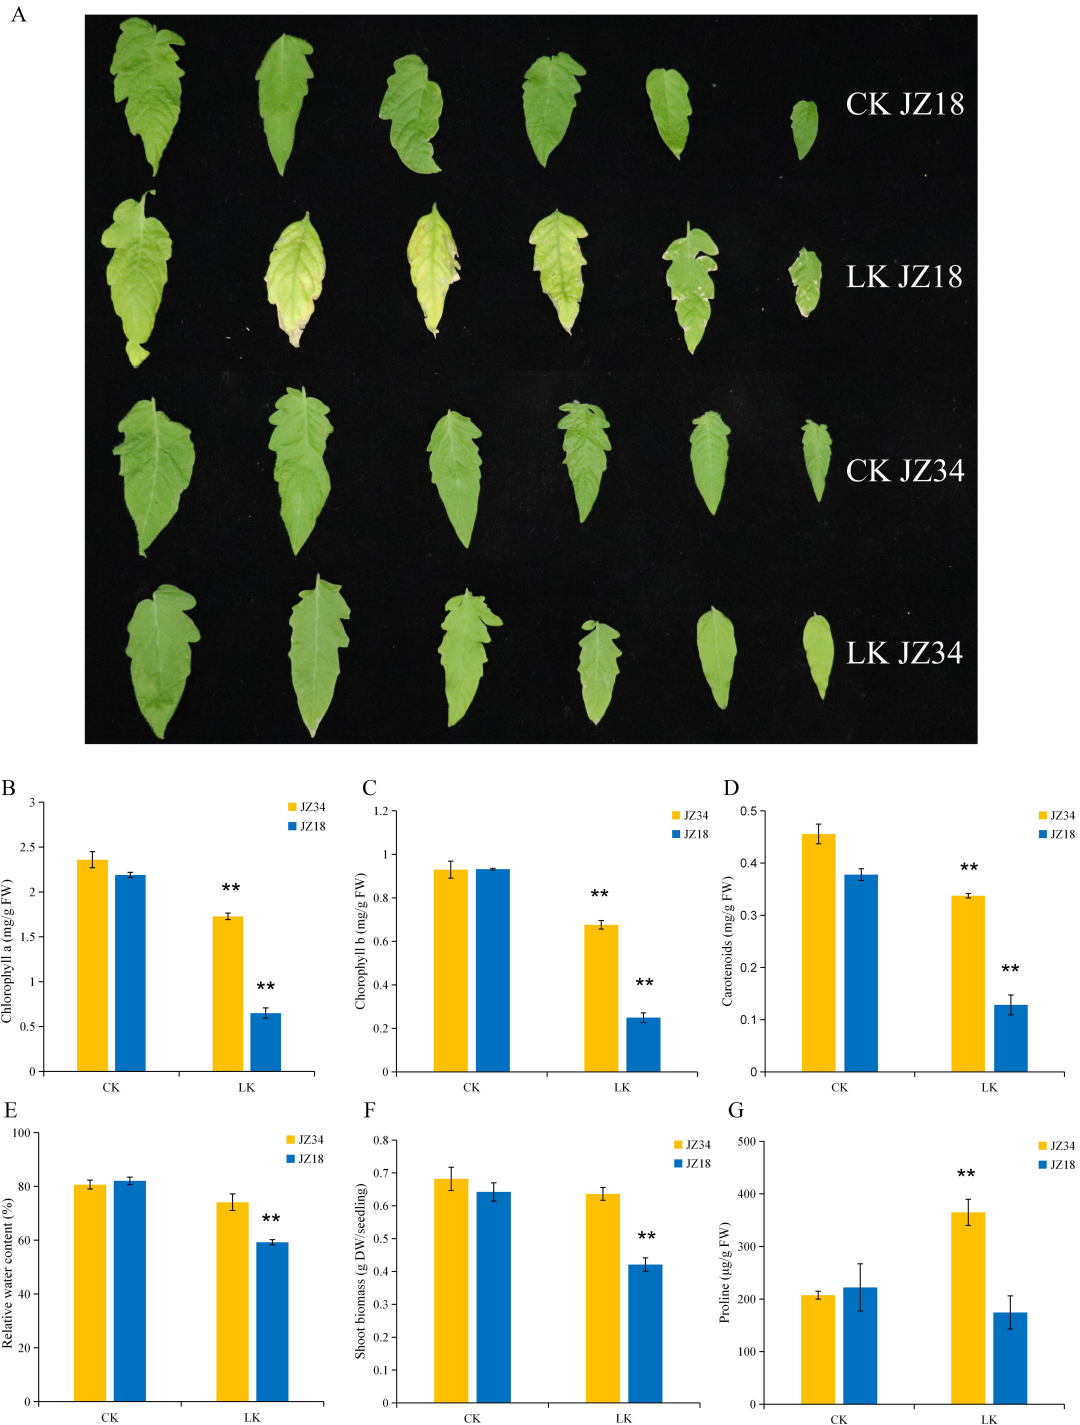

**Fig. 2** Leaves phenotype of JZ18 and JZ34 plants under control  $K^+$  (4 mM) and LK (0.5 mM) stress conditions for 21 days. (A) Leaves phenotype, (B) Chlorophyll a content, (C) Chlorophyll b content, (D) Carotenoids content, (E) Relative water content, (F) Shoot biomass and (G) Proline content in JZ18 and JZ34 plants under LK and control conditions for 21 days. The presented data are the means  $\pm$  SE of three independent experiments ( $n=12$ ). Asterisks indicate significant difference between JZ18 and JZ34 plants (\* $P < 0.05$ , \*\* $P < 0.01$ ).

175 **3.2 Na<sup>+</sup>, K<sup>+</sup>, Ca<sup>2+</sup> and Mg<sup>2+</sup> content in roots and leaves of JZ18 and JZ34**  
 176 **plants**

177 We examined the content of K<sup>+</sup>, Na<sup>+</sup>, Ca<sup>2+</sup> and Mg<sup>2+</sup> under LK conditions for 0  
 178 days, 1 days, 3 days and 7 days in both roots and shoots of JZ18 and JZ34 plants. In  
 179 response to LK stress, compared with JZ18, JZ34 exhibited higher K<sup>+</sup> content in both  
 180 roots and shoots at various stages after LK treatment (**Fig. 3 A-B**). Without LK  
 181 treatment (0 days), there was no difference between JZ18 and JZ34 plants. The Na<sup>+</sup>  
 182 content exhibited a opposite trend to the K<sup>+</sup> content, which was less in JZ34 than JZ18  
 183 in both roots and shoots (**Fig. 3 C-D**). So the Na<sup>+</sup>/K<sup>+</sup> ratio in both roots and shoots of  
 184 the JZ34 was lower than the JZ18 after LK treatment, and this difference was most  
 185 significant in the roots after LK treatment for 7 days (**Fig. 3 E-F**). Base on the above,  
 186 Na<sup>+</sup>/K<sup>+</sup> homeostasis of JZ18 has been severely damaged in the root after LK treatment  
 187 for 7 days.

188 The accumulation of Ca<sup>2+</sup> and Mg<sup>2+</sup> has been reported to be associated with LK  
 189 response (Behera *et al.* 2016; Kocourková *et al.* 2020; Dong *et al.* 2021), and we  
 190 measured the content of Ca<sup>2+</sup> and Mg<sup>2+</sup> in both JZ18 and JZ34 plants after LK  
 191 treatment. The content of Ca<sup>2+</sup> and Mg<sup>2+</sup> were higher in the root of JZ34 than  
 192 JZ18, while there were no significant difference in the shoots (**Fig. 3 G-J**). The results  
 193 implies that JZ34 may relieve the LK stress through the Ca<sup>2+</sup> and Mg<sup>2+</sup> signaling  
 194 pathway (Wang *et al.* 2021).

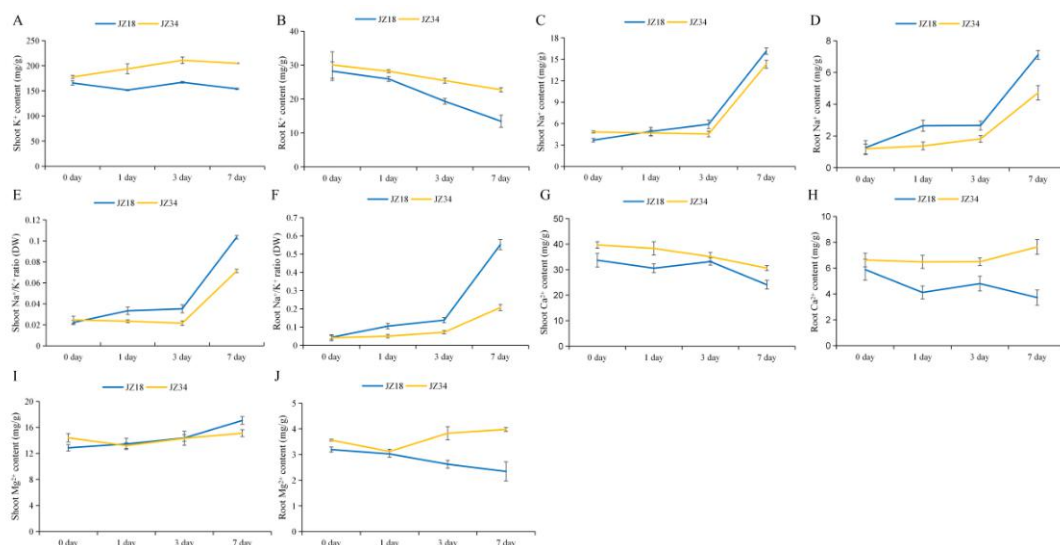

**Fig. 3** K<sup>+</sup>, Na<sup>+</sup>, Ga<sup>2+</sup>, and Mg<sup>2+</sup> accumulation in root and shoot tissues of JZ18 and JZ34 plants in response to LK stress. (A) K<sup>+</sup> content in shoot, (B) K<sup>+</sup> content in root, (C) Na<sup>+</sup> content in shoot, (D) Na<sup>+</sup> content in root, (E) Na<sup>+</sup>/K<sup>+</sup> ratio in shoot, (F) Na<sup>+</sup>/K<sup>+</sup> ratio in root, (G) Ca<sup>2+</sup> content in shoot, (H) Ca<sup>2+</sup> content in root, (I) Mg<sup>2+</sup> activity in shoot, and (J) Mg<sup>2+</sup> activity in root of JZ18 and JZ34 plants

under LK stress conditions for 0 days, 1 days, 3 days, and 7 days. The presented data are the means  $\pm$  SE of three independent experiments (n=12).

### 195 *3.3 ROS accumulation and antioxidative competence in JZ18 and JZ34*

#### 196 *plants under LK stress*

197 Normally, plants will produce a large amount of reactive oxygen species (ROS)  
198 under LK stress (Mittler 2002; R and Schachtman 2004). In both JZ18 and JZ34  
199 plants, the ROS content exhibited an increase trend at the onset of the treatment of LK  
200 stress and then declining at late treatment stages, suggesting that the oxidative damage  
201 caused by LK stress occurs in the early of LK stress (**Fig. 4 A-D**). In general, after  
202 treatment with LK, the content of  $O_2^-$  and  $H_2O_2$  in JZ18 is higher than JZ34, no matter  
203 in the root or shoot, which implies that the JZ34 accumulated less ROS in comparison  
204 with JZ18. MDA as an index of cellular damage in response to LK stress. After LK  
205 stress treatment, the MDA content in JZ34 roots was lower than JZ18 (**Fig. 4 E-F**).  
206 These results suggest that the lipid peroxidation was lower and the membrane stability  
207 was higher in JZ34 roots than JZ18 after LK treatment .

208 The activity of antioxidative enzymes, including superoxide dismutase (SOD),  
209 peroxidase (POD), catalase (CAT), and ascorbate peroxidase (APX) in both JZ18 and  
210 JZ34 plants was determined at various time. With the LK treatment time, the activity  
211 of antioxidative enzyme has changes differently to respond LK stress (**Fig. 4 G-N**).  
212 The activity of SOD and POD showed no significant differences between JZ18 and  
213 JZ34 in the shoots after LK treatment, while the activity of SOD and POD was higher  
214 in the roots of JZ34 than JZ18 after LK treatment (**Fig. 4 G-J**). CAT and APX showed  
215 the same trends, that is, the enzyme activity were significantly higher in both roots  
216 and shoots of JZ34 plants compared to JZ18 plants after LK treatment (**Fig. 4 K-N**).

217 All the results demonstrate that in the roots and shoots, JZ34 has lower ROS  
218 accumulation and less lipid peroxidation and higher the activity of antioxidative  
219 enzymes in comparison with JZ18 in most of the periods under LK stress.

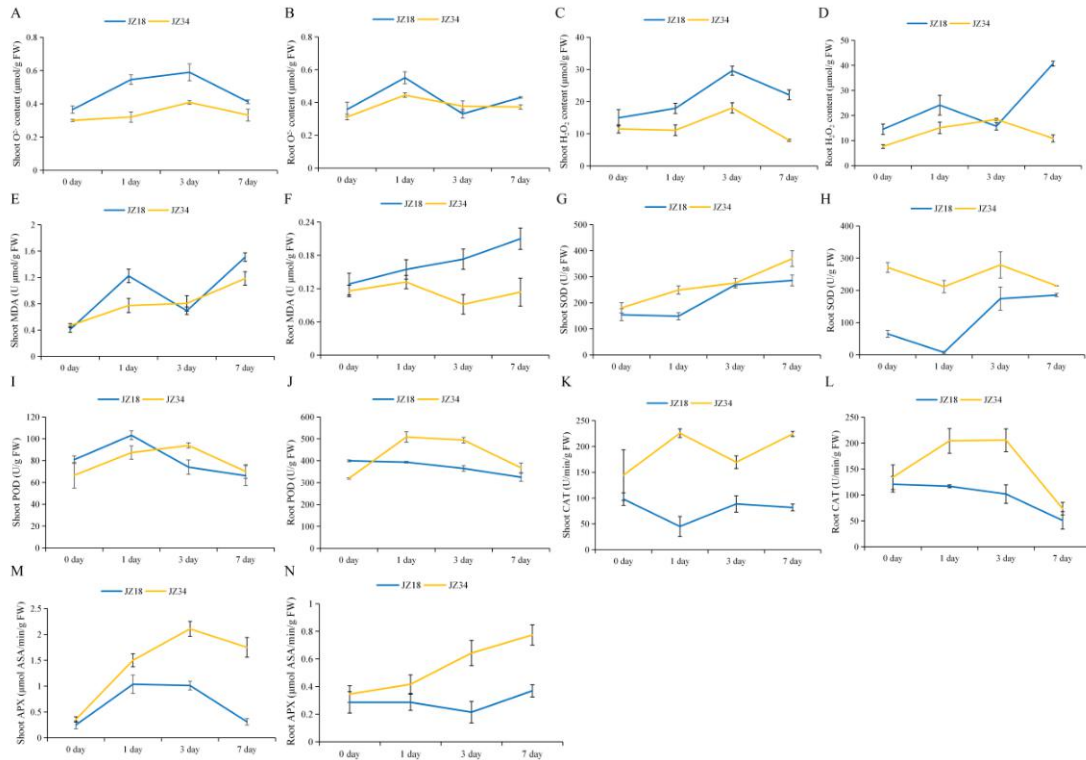

**Fig. 4** The responses of ROS accumulation and antioxidative competence in JZ18 and JZ34 plants to LK stress. (A)  $O_2^-$  content in shoot (B)  $O_2^-$  content in root (C)  $H_2O_2$  content in shoot (D)  $H_2O_2$  content in root (E) MDA content in shoot (F) MDA content in root (G) SOD activity in shoot (H) SOD activity in root (I)POD activity in shoot (J) POD activity in root (K) CAT activity in shoot (L) CAT activity in root (M) APX activity in shoot (N) APX activity in root of JZ18 and JZ34 plants under LK conditions for 0 days, 1 days, 3 days and 7 days. The presented data are the means  $\pm$  SE of three independent experiments (n=12).

### 220 3.4 Inheritance analysis of LK tolerance in $F_2$ generation

221 To investigate the genetic basis of LK tolerance, we measured the  $F_2$  individuals  
 222 corresponding parameters to confirm the relationship between root length and  $K^+$   
 223 content. The Pearson correlation coefficients ( $R^2$ ) between root length and  $K^+$  content  
 224 were calculated. There was a significant positive correlation between the two  
 225 parameters ( $R^2=0.72$ ,  $P < 0.01$ ) suggesting that root length in tomato is indeed a  
 226 reliable indicator for  $K^+$  content (**Fig. 5**).

227 Under LK conditions, the root length values of six generations ( $P_1$ ,  $P_2$ ,  $F_1$ ,  $BC_1P_1$ ,  
 228  $BC_1P_2$  and  $F_2$ ) are shown in **Table 1**. Compared with the mean of phenotypic values  
 229 of two parents, the values of  $F_1$  population were between the two parents for root  
 230 length. The coefficient of variation of  $BC_1P_1$ ,  $BC_1P_2$  and  $F_2$  showed a higher level  
 231 than parents in the lateral root length. The coefficient of variations were higher for  
 232 segregating populations than parents populations, indicating that the segregating  
 233 generations showed larger genotypic variation. The frequency distribution of root

234 length in BC<sub>1</sub>P<sub>1</sub>, BC<sub>1</sub>P<sub>2</sub> and F<sub>2</sub> populations under LK conditions were observed in **Fig.**  
 235 **5**. The results performed clear skewed distribution in backcross populations and  
 236 normal distribution in F<sub>2</sub> generation. Thus, the LK resistance was a quantitative trait,  
 237 which may be controlled by a mixed major plus polygene model.

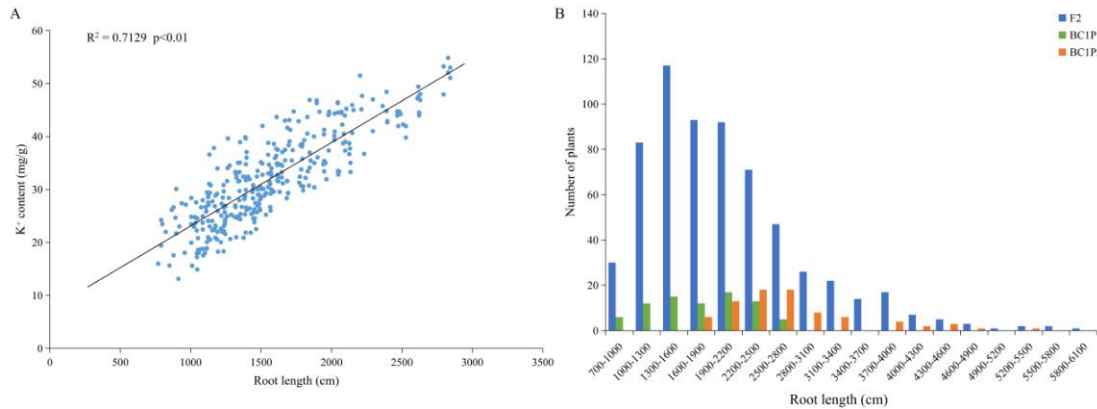

**Fig. 5** (A) Correlation of the root length and K<sup>+</sup> content. (B) Frequency distributions of the lateral root length in BC<sub>1</sub>P<sub>1</sub>, BC<sub>1</sub>P<sub>2</sub> and F<sub>2</sub> generations.

**Table 1**

Descriptive statistics of the lateral root length in six generations.

| Trait          | Generation | Max     | Min     | Mean    | SD      | Variance   | CV(%) | Skewness | Kurtosis |
|----------------|------------|---------|---------|---------|---------|------------|-------|----------|----------|
| Root length/cm | P1         | 1960.07 | 1450.91 | 1726.69 | 140.00  | 19600.71   | 8.11  | -0.28    | -0.85    |
|                | P2         | 3267.98 | 2206.61 | 2657.63 | 334.57  | 111933.92  | 12.59 | 0.32     | -1.11    |
|                | F1         | 3174.75 | 1226.69 | 2376.12 | 637.59  | 406523.98  | 26.83 | -0.43    | -1.21    |
|                | BC1P1      | 7718.74 | 700.57  | 2162.68 | 995.74  | 991500.36  | 46.04 | 2.01     | 8.25     |
|                | BC2P2      | 6843.39 | 708.60  | 2224.82 | 1042.83 | 1087504.72 | 46.87 | 1.60     | 4.11     |
|                | F2         | 6033.68 | 723.13  | 2045.84 | 863.82  | 746192.94  | 42.22 | 1.31     | 2.23     |

### 238 3.5 The best-fit genetic model and effect analysis

239 To evaluate a genetic model for root length under K<sup>+</sup> deficiency, the AIC values  
 240 and Log Max likelihood values of 24 genetic models were calculated using joint  
 241 segregation analysis methods in six generations (**Table 2**). Two genetic models with  
 242 minimum AIC values would be identified as candidate models of root length. The AIC  
 243 values of the E-0 and E-1 models were 16025.5334 and 16018.3735, respectively.  
 244 Next, the goodness-of-fit test was implemented for candidate models to select the  
 245 optimal model via Uniformity test ( $U_2^1$ ,  $U_2^2$  and  $U_2^3$ ), Smirnov test ( $nW^2$ ) and  
 246 Kolmogorov test ( $D_n$ ) (**Table 3**). The genetic model with the least number of values  
 247 achieving statistically significant was identified as the best-fit model. The number of  
 248 values reaching the significance level for the E-0 and E-1 models were both 1. It's  
 249 sensible for models selection to combine the AIC values with the goodness-of-fit test.  
 250 Therefore, the E-1 (two additive-dominance-epistasis major gene plus  
 251 additive-dominance polygenes) was the best-fit model for the root length under LK

252 stress conditions. These results suggested that the two major gene plus polygenes  
 253 regulated the inheritance model of LK resistance.

**Table 2**

Akaike's Information Criterion (AIC) value under various genetic models for the lateral root length

| Model code | Model implication | AIC value  | Max-likelihood-value | Model code | Model implication | AIC value                | Max-likelihood-value |
|------------|-------------------|------------|----------------------|------------|-------------------|--------------------------|----------------------|
| A-1        | 1MG-AD            | 16219.8839 | -8105.942            | D-0        | MX1-AD-ADI        | 16069.0986               | -8022.5493           |
| A-2        | 1MG-A             | 16200.0987 | -8097.0494           | D-1        | MX1-AD-AD         | 16173.5887               | -8077.7943           |
| A-3        | 1MG-EAD           | 16242.1528 | -8118.0764           | D-2        | MX1-A-AD          | 16177.8275               | -8080.9138           |
| A-4        | 1MG-AEND          | 16262.0177 | -8128.0089           | D-3        | MX1-EAD-AD        | 16056.5491               | -8020.2746           |
| B-1        | 2MG-ADI           | 16221.5518 | -8100.7759           | D-4        | MX1-AEND-AD       | 16183.6977               | -8083.8488           |
| B-2        | 2MG-AD            | 16185.9301 | -8086.965            | E-0        | MX2-ADI-ADI       | <b><u>16025.5334</u></b> | -7994.7667           |
| B-3        | 2MG-A             | 17547.1172 | -8769.5586           | E-1        | MX2-ADI-AD        | <b><u>16018.3735</u></b> | -7994.1868           |
| B-4        | 2MG-EA            | 16198.9607 | -8096.4803           | E-2        | MX2-AD-AD         | 16061.7738               | -8019.8869           |
| B-5        | 2MG-AED           | 16201.7892 | -8096.8946           | E-3        | MX2-A-AD          | 16126.3868               | -8054.1934           |
| B-6        | 2MG-EEAD          | 16223.1153 | -8108.5577           | E-4        | MX2-EA-AD         | 16183.5778               | -8083.7889           |
| C-0        | PG-ADI            | 16165.9703 | -8072.9852           | E-5        | MX2-AED-AD        | 16033.2683               | -8007.6341           |
| C-1        | PG-AD             | 16181.7562 | -8083.8781           | E-6        | MX2-EEAD-AD       | 16046.9267               | -8015.4634           |

*Note:* The lowest AIC values of candidate genetic models for lateral root length are underlined and bold.

**Table 3**

Test for goodness-of-fit of the candidate genetic models

| Model code | Generation | U <sub>1</sub> | U <sub>2</sub> | U <sub>3</sub> | nW <sup>2</sup> | Dn          |
|------------|------------|----------------|----------------|----------------|-----------------|-------------|
| E-0        | P1         | 0.07 (0.79)    | 0.16 (0.69)    | 0.36 (0.55)    | 0.12 (0.52)     | 0.05 (1.00) |
|            | P2         | 0.04 (0.84)    | 0.00 (0.99)    | 0.58 (0.45)    | 0.07 (0.74)     | 0.04 (1.00) |
|            | F1         | 0.11 (0.73)    | 0.34 (0.56)    | 1.04 (0.31)    | 0.16 (0.36)     | 0.11 (0.74) |
|            | BC1P1      | 0.84 (0.36)    | 1.63 (0.20)    | 2.42 (0.12)    | 0.34 (0.11)     | 0.01 (1.00) |
|            | BC1P2      | 0.08 (0.78)    | 0.26 (0.61)    | 0.92 (0.34)    | 0.08 (0.73)     | 0.01 (1.00) |
|            | F2         | 1.23 (0.27)    | 0.75 (0.39)    | 0.67 (0.41)    | 0.53 (0.03) *   | 0.00 (1.00) |
| E-1        | P1         | 0.22 (0.64)    | 0.12 (0.73)    | 0.19 (0.66)    | 0.1 (0.60)      | 0.06 (0.99) |
|            | P2         | 0.32 (0.57)    | 0.11 (0.74)    | 0.72 (0.40)    | 0.10 (0.60)     | 0.06 (0.99) |
|            | F1         | 0.00 (0.99)    | 0.05 (0.83)    | 0.79 (0.37)    | 0.14 (0.44)     | 0.12 (0.62) |
|            | BC1P1      | 0.00 (0.99)    | 0.21 (0.64)    | 3.56 (0.06)    | 0.22 (0.24)     | 0.01 (1.00) |
|            | BC1P2      | 0.02 (0.90)    | 0.72 (0.40)    | 8.40 (0.00) *  | 0.27 (0.17)     | 0.01 (1.00) |
|            | F2         | 0.39 (0.53)    | 0.20 (0.66)    | 0.41 (0.52)    | 0.19 (0.28)     | 0.00 (1.00) |

*Note:* \* represents significance at the 0.05 level.

254 The first-order genetic and second-order genetic parameters of the optimal  
 255 inheritance models for the root length under LK stress were listed in **Table 4**. Root  
 256 length exhibited equal additive effect in two major gene due to  $d_a=d_b$ . The dominance  
 257 effect of the first major gene were greater than those of the second major gene for root  
 258 length. The potential ratio  $|h_a/d_a|$  and  $|h_b/d_b|$  of the major gene were less than 1,



259 suggesting that the dominance effect was smaller than the additive effect of two major  
 260 genes. The additive plus dominance interaction effect ( $j_{ab}$ ) and dominance plus  
 261 additive interaction effect ( $j_{ba}$ ) were positive values, indicating that these interactions  
 262 between two major genes improved root length to enhance LK tolerance. Thus,  
 263 additive, dominant and epistatic effects are important for the inheritance of tomato LK  
 264 resistance.

265 The heritability of major gene from the BC<sub>1</sub>P<sub>1</sub>, BC<sub>1</sub>P<sub>2</sub> and F<sub>2</sub> populations were  
 266 0.88%, 50.4% and 69.45%, respectively, indicating the diversity of genetic  
 267 inheritance. The heritability of major gene were greater than the polygene heritability  
 268 for F<sub>2</sub> generation, suggesting that LK stress was primarily regulated by genetic factors.  
 269 The root length were slightly affected by environmental factors due to the high  
 270 heritability, and indicating that selection for root length in early generations is most  
 271 efficient.

**Table 4**

The estimate of genetic parameters of the best-fit model for the six traits

| 1st order parameter | Estimate | 2nd order parameter | Estimate                       |                                |                |
|---------------------|----------|---------------------|--------------------------------|--------------------------------|----------------|
|                     | E-1      |                     | BC <sub>1</sub> P <sub>1</sub> | BC <sub>1</sub> P <sub>2</sub> | F <sub>2</sub> |
| da                  | -692.85  | $\sigma_p^2$        | 991500.36                      | 1087504.72                     | 746192.94      |
| db                  | -692.85  | $\sigma_{mg}^2$     | 8821.42                        | 552148.08                      | 519050.12      |
| ha                  | -208.82  | $\sigma_{pg}^2$     | 823470.43                      | 374195.43                      | 59394.40       |
| hb                  | 76.37    | $h_{mg}^2$          | 0.88                           | 50.41                          | 69.45          |
| i                   | 612.15   | $h_{pg}^2$          | 82.25                          | 34.16                          | 7.95           |
| l                   | -375.86  |                     |                                |                                |                |
| jab                 | 144.72   |                     |                                |                                |                |
| jba                 | 429.90   |                     |                                |                                |                |
| ha/da               | 0.30     |                     |                                |                                |                |
| hb/db               | -0.11    |                     |                                |                                |                |

*Note:* d<sub>a</sub>: additive effect of the first pair major gene; d<sub>b</sub>: additive effect of the second pair major gene; h<sub>a</sub>: dominant effect of the first pair major gene; h<sub>b</sub>: dominant effect of the second pair major gene; i: additive effect plus additive effect of the two major genes; l: dominant effect plus dominant effect of the two major genes; j<sub>ab</sub>: additive effect plus dominant effect of the two major genes; j<sub>ba</sub>: dominant effect plus additive effect of the two major genes; h<sub>a</sub>/d<sub>a</sub>: dominance degree of the first major gene; h<sub>b</sub>/d<sub>b</sub>: dominance degree of the second major gene;  $\sigma_p^2$ : phenotypic variance;  $\sigma_{mg}^2$ : major gene variance;  $\sigma_{pg}^2$ : polygene variance;  $h_{mg}^2(\%)$ : major gene heritability;  $h_{pg}^2(\%)$ : polygene heritability.

### 272 3.6 QTL-seq analysis combining SNP-index and InDel-index

273 To identify the QTL for LK tolerance, we compared two extreme pools from the

274 F<sub>2</sub> population, a LK resistance pool (R-pool) and LK susceptibility (S-pool) using  
275 BSA-seq. A total of 118.13 Gb valid data were obtained by Illumina sequencing,  
276 including 32.63 Gb from the R-pool and 39.79 Gb from the S-pool, all of high quality  
277 (91.38% > Q30 > 93.82%) and with a stable GC content (41.00% > GC > 46.83%)  
278 (**Table 5**). We used Venn diagrams to demonstrate the relationships between SNPs and  
279 InDels among the parents and the mixed pools (**Fig. 6 A-B**). A total of identified  
280 990,251 SNPs and 217,061 InDels in the four pools in comparison with the reference  
281 genome respectively. These high-quality data lay a solid foundation for subsequent  
282 analysis.

283 To detect the major QTLs responsible for LK tolerance, we used SNP-index and  
284 InDel-index association algorithms (**Fig. 6 C-D**). As shown in Fig, 61.87- 64.45 Mb  
285 (2.58 Mb) region on chromosome A04 and 39.27- 40.65 (1.38Mb) region on  
286 chromosome A06 exhibiting significant linkage were identified as the candidate  
287 region, and both the two different methods mapped these QTL at a 95% significance  
288 level. The result is consistent with the analysis result of the previous genetic model  
289 that LK resistance was controlled by two pairs of major genes. Therefore, the two  
290 candidate region were selected as the major QTL for LK resistance. On chromosome  
291 A04 candidate region annotated a total of 369 genes, including 18 non-synonymous  
292 genes and 5 frameshifted genes. On chromosome A06 candidate region annotated a  
293 total of 198 genes, including 9 non-synonymous genes and 3 frameshifted genes.

294 The Physiological results were used to identify the candidate genes within the  
295 2.58 Mb and 1.38 Mb intervals. A total of 4 genes were linked to antioxidant, including  
296 *Solyc04g080330* (peroxidase 10), *Solyc04g080760* (peroxidase 9), *Solyc04g081860*  
297 (peroxidase 64) and *Solyc04g082460* (catalase isozyme 3). *Solyc06g068680* (RBOHD)  
298 was responsible for the generation of LK-induced ROS signals. In addition,  
299 *Solyc04g081910* (Calcium-dependent protein kinase ) and *Solyc06g068960*  
300 (Calmodulin) transferred Ca<sup>2+</sup> signal, and *Solyc06g068490* (magnesium transporter  
301 MRS2-1) involved in Mg<sup>2+</sup> transporter. The transcript levels of these genes were  
302 significantly changed under LK conditions in JZ18 and JZ34 (**Fig. 6 E**). In JZ18 plant,  
303 the expression levels of most genes were down-regulated with LK treatment.  
304 However, most genes in JZ34 plant were up-regulated, especially *Solyc04g080330*  
305 and *Solyc04g081860*.

**Table 5**

Sequencing data quality statistics

| Sample | Raw_Reads | Raw_Bases | Valid_Reads | Valid_Bases | Valid% | Q20%  | Q30%  | GC%   |
|--------|-----------|-----------|-------------|-------------|--------|-------|-------|-------|
| JZ18   | 164366004 | 24.65G    | 155226540   | 23.28G      | 94.44  | 96.74 | 91.63 | 43.95 |



|      |           |        |           |        |       |       |       |       |
|------|-----------|--------|-----------|--------|-------|-------|-------|-------|
| JZ34 | 159970176 | 24.00G | 149552510 | 22.43G | 93.49 | 96.59 | 91.38 | 41.00 |
| S_F2 | 273786410 | 41.07G | 265248210 | 39.79G | 96.88 | 97.86 | 93.82 | 44.17 |
| R_F2 | 242359902 | 36.35G | 217517696 | 32.63G | 89.75 | 96.77 | 92.14 | 46.83 |

Note: Q20 is the proportion of bases with quality value  $\geq 20$  (base recognition accuracy rate  $> 99\%$ ); Q30 is the proportion of bases with quality value  $\geq 30$  (base recognition accuracy rate  $> 99.9\%$ ); GC(%) is the content of bases G and C and the proportion of total bases.

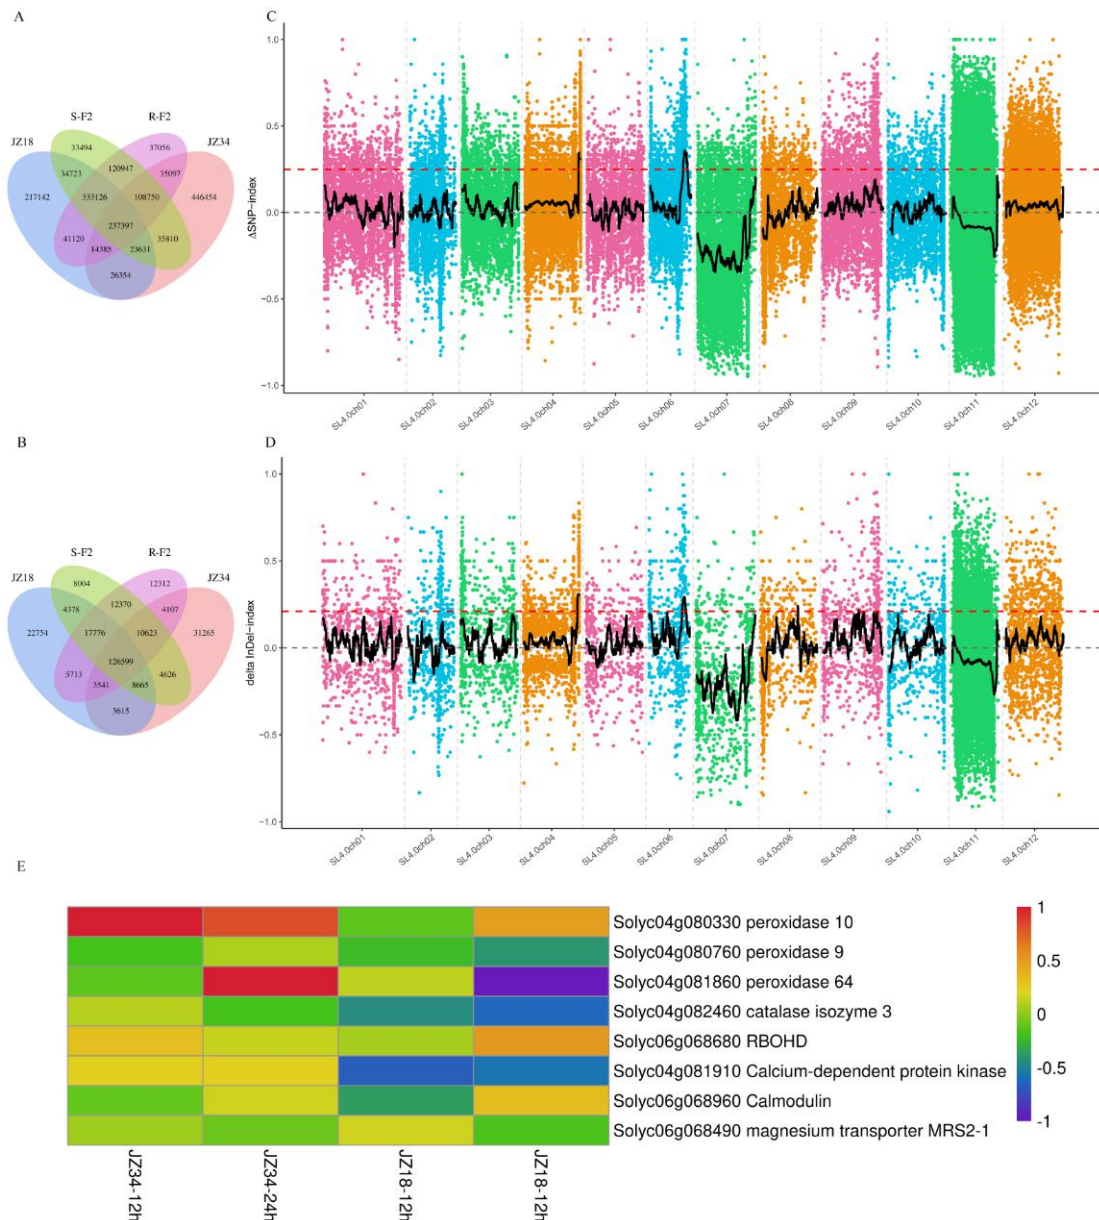

**Fig. 6** SNP statistics and BSA analysis. (A) Venn diagram of SNP in the four pools. (B) Venn diagram of InDel in the four pools. (C) SNP-index algorithm to map root length based LK stress gene. (D) InDel-index algorithm to map root length based LK stress gene. (E) Differentially expressed genes involved ROS and ion signaling pathways from our previous report (Zhao *et al.* 2018).

## 306 **4. Discussion**

### 307 *4.1 Root length is an important morphologically adaptive traits for LK*

308 In our study, long-term LK treatment, the JZ34 plants maintained normal root  
309 growth and kept leaves green. However, in JZ18 plants, short-term LK treatment  
310 caused damage to normal root growth, and after further increasing the time of LK  
311 treatment, the leaves of JZ18 plants gradually showed turned yellow-green color. The  
312  $K^+$  uptake by plant root cells as well as  $K^+$  transport inside plants are conducted by a  
313 large number of  $K^+$  channels and transporters (Wang and Wu 2013; Very *et al.* 2014).  
314  $K^+$  deficiency enhances the elongation of root hair and inhibites primary root growth  
315 in *Arabidopsis thaliana* (Jung *et al.* 2009; Qin *et al.* 2019). Thus, root characterization  
316 of JZ34 plant under LK stress is a direct evidence to prove its LK resistance.  
317 Moreover, we measured some physiological index to support the results of phenotypic  
318 observation. The JZ34 had higher root biomass, root length, root area and root fork,  
319 which exhibited the strong root growth ability of JZ34 plant under LK conditions.  
320 Under LK stress, the biomass, chlorophyll content, RWC and proline content in the  
321 leaves were higher in JZ34 plants than the JZ18 plants, which may be owing to the  
322 JZ34 plants adapted to LK stress conditions through maintaining normal root growth.  
323 These findings showed that JZ34 is a LK resistance tomato variety through normal  
324 growth of root to absorb more  $K^+$ .

325 The elongation of root length is an essential adaptive trait for LK tolerance. The  
326 change of  $K^+$  concentration influences root developmental processes, including  
327 primary root growth, lateral root formation and root-hair formation (López-Bucio *et al.*  
328 2003). The early investigation to screen  $K^+$  high efficient tomato varieties under  $K^+$   
329 deficiency, the root activity was used as  $K^+$  efficiency genotype screening optimal  
330 index (Yang *et al.* 2015). In addition, several LK resistance genes have been mapped  
331 through the observation of the growth of root length under  $K^+$  deficiency in  
332 *Arabidopsis*, including *CIPK23*, *AtKCI*, *MYB59* and *NPF7.3/NRT1.5* (Xu *et al.* 2006;  
333 Wang *et al.* 2010; Li *et al.* 2017; Du *et al.* 2019), indicating the great contribution of  
334 the root length for the genetic investigation of LK stress. There was a significant  
335 difference for root length between the LK-tolerance line JZ34 and LK-sensitive line  
336 JZ18. The highly significant positive correlation between root length and  $K^+$  content  
337 showed the root length is well indicator of LK resistance. Due to counting root length  
338 is more simple and more direct than measuring of  $K^+$  content, root length offers an  
339 easier choice for assessing LK tolerance.

340 *4.2 LK resistance is a quantitative trait controlled by multiple genes in*  
341 *tomato*

342 Improving of LK tolerance is the one of important targets in tomato breeding.  
343 The genetic analysis of tolerance to LK in maize have been also estimated using joint  
344 segregation analysis, showing that tolerance to LK stress in maize was dominated by  
345 one major gene plus polygene (Li *et al.* 2011). However, the studies of genetic  
346 inheritance to LK stress in tomato were rarely applied breeding. Here, we attempted  
347 to further clarify the inheritance mechanism of LK resistance in tomato, six  
348 generations (P<sub>1</sub>, P<sub>2</sub>, F<sub>1</sub>, B<sub>1</sub>, B<sub>2</sub> and F<sub>2</sub>) were used to analyze the major gene plus  
349 polygene inheritance model based root length under LK stress. Root length under LK  
350 conditions in tomato was a quantitative trait, which were controlled by a group of  
351 genes with different effects. Under LK condition, the inheritance model and  
352 inheritance effect of root length was assessed by joint segregation analysis based on  
353 the AIC values, max-likelihood value, and goodness-of-fit test. The results suggested  
354 that the best-fit model was regulated by two additive-dominance-epistasis major genes  
355 plus additive-dominance polygene inheritance model (E-1). In early study, the  
356 inheritance methods of K<sup>+</sup> utilization efficiency have been similarly considered as  
357 additive-dominance-epistasis polygene genetic model (Gabelman and Loughman  
358 1987). In our study, the major gene heritability of BC<sub>1</sub>P<sub>1</sub>, BC<sub>1</sub>P<sub>2</sub> and F<sub>2</sub> populations  
359 were 0.88%, 50.4% and 69.45%, respectively, indicating that the inheritance method  
360 of each populations was diverse due to the genetic background of the parents' traits  
361 (Ye *et al.* 2017). The phenotype characters were influenced by close integration  
362 between genetic effect and environmental influence. Our genetic analysis results  
363 showed that the root length was affected by smaller environmental influence, and the  
364 trait choice should occur in early populations. Further SNP-index and InDel-index  
365 linkage analysis with two extreme mixed pool of root length contains approximately  
366 30 individuals generally maps the two target regions. The major QTL interval were  
367 2.38Mb at the end of chromosome 4 and 1.38 Mb at the chromosome 6, which are  
368 consistent with previous analysis of the genetic model controlled by two major gene.

369 *4.3 Ion and antioxidant signal may be involved in the mechanism of LK*  
370 *stress*

371 The ability to maintain ion homeostasis play an essential role for LK resistance

372 and involves a network of transport processes that regulates uptake, extrusion through  
373 the plasma membrane in plants (Apse and Blumwald 2007). In our study, the  $K^+$   
374 content was higher in JZ34 compared with JZ18 plants after LK treatment, suggesting  
375 that the activity of  $K^+$  transporter or  $K^+$  channel might be improved in JZ34 plants to  
376 respond LK stress. By contrast, in root and shoot tissues, the JZ34 showed lower  $Na^+$   
377 content than the JZ18 plants, which caused a higher  $Na^+/K^+$  ratio in JZ18 plants after  
378 LK stress. Especially, after LK treatment for 7 days in the roots, these  $Na^+/K^+$  ratio  
379 existed a significant difference between JZ34 and JZ18 plants, showing that the  
380 damage of ion homeostasis becomes more serious as the treatment time of LK stress  
381 increases in the roots of JZ18 plants.

382 Recent research found that high concentrations of  $Mg^{2+}$  disrupt  $K^+$  homeostasis,  
383 and that transcription of  $K^+$  homeostasis-related genes CIPK9 and HAK5 is changed  
384 to limit the elongation of root length.(Kocourková *et al.* 2020).  $Ca^{2+}$  signal also can be  
385 triggered rapid  $K^+$  deprivation in the root, in which  $Ca^{2+}$  induces CIF peptides to  
386 activate SGN3-LKS4/SGN1 receptor complexes, and then convey HAK5  $K^+$   
387 transporter induction (Wang *et al.* 2021). Our characterization of the two candidate  
388 regions at the chromosome 4 and 6, existed 3 genes, *Solyc04g081910*  
389 (Calcium-dependent protein kinase), *Solyc06g068960* (Calmodulin) transferred  $Ca^{2+}$   
390 signal, and *Solyc06g068490* (magnesium transporter MRS2-1) involved in  $Mg^{2+}$   
391 transporter. Especially, *Solyc04g081910* (Calcium-dependent protein kinase) gene  
392 expression was down-regulated in JZ18 plants. Thus, the results obtained in root and  
393 shoot tissues, the lower accumulation of  $Ca^{2+}$  and  $Mg^{2+}$  in JZ18 plants than JZ34  
394 plants suggested JZ34 may respond to LK stress through maintain normal  $Ca^{2+}$  and  
395  $Mg^{2+}$  signal.

396  $K^+$  deficiency induces the accumulation of ROS and generates ROS associated  
397 injury (Mittler 2002; R and Schachtman 2004). LK stress inducing the production of  
398 ROS for JZ18 and JZ34 plants was found in previous study, but the reason have  
399 remained unknown (Zhao *et al.* 2018). In the present study, in roots and shoots, LK  
400 stress led to ROS accumulation and increased MDA content in JZ18, which further  
401 resulted in membrane lipid peroxidation and cell membrane damage. The JZ34 plants  
402 exhibited slight ROS accumulation and cell membrane damage. Moreover, JZ34  
403 treated by LK stress had a higher proline levels than normal  $K^+$  treatment, which  
404 protect cells against increased ROS levels. To neutralize the injury of oxidative stress,  
405 plants use precisely controlled ROS scavenging strategies, such as enzymatic systems  
406 (Mittler 2002; Golldack *et al.* 2014). Interestingly, 4 genes related to antioxidant

407 enzymes were selected in candidate regions, including *Solyc04g080330*  
408 (peroxidase10), *Solyc04g080760* (peroxidase9), *Solyc04g081860* (peroxidase64), and  
409 *Solyc04g082460* (catalase isozyme3). The expression of these gene were up-regulated  
410 under LK conditions in JZ34 plants, while in JZ18 plants were down-regulated.  
411 After LK treatment, in roots and shoots, JZ34 had higher activities of antioxidant  
412 enzymes for SOD, APX, and CAT than JZ18 plants at all periods, implying that the  
413 JZ34 plants might be involved to the improved activities of antioxidant enzymes to  
414 reduce the injury of oxidative stress, and then enhanced LK resistance. In the recent  
415 study showed that plants sense  $K^+$  deficiency and trigger rapid  $K^+$  and  $Ca^{2+}$  signals,  
416 and then phosphorylates and activates RBOHC/D/F for ROS signal formation to  
417 convey HAK5  $K^+$  transporter induction (Wang *et al.* 2021). In the candidate regions,  
418 we just found *Solyc06g068680* (RBOHD) can induced the accumulation of ROS, and  
419 its expression was up-regulated in JZ18 and JZ34 plants under LK conditions. This  
420 also indicated that, LK stress led to the decrease of  $K^+$ ,  $Ca^{2+}$ , and  $Mg^{2+}$  content, which  
421 may translate signals to enhance ROS accumulation, and further regulated the  
422 expression of genes related to LK in response to LK stress in tomato.

423 In conclusion, JZ34 improved  $Na^+/K^+$  homeostasis, and repressed ROS  
424 accumulation under LK stress, suggesting that JZ34 can enhance the LK stress  
425 tolerance compared with JZ18 plants. The method of major gene plus polygene model  
426 with the application of the joint segregation analysis, we showed that the root length  
427 trait under LK stress might regulated by two additive-dominance-epistasis major  
428 genes plus additive-dominance polygene inheritance model (E-1). Through BSA-seq,  
429 two major-effect QTLs that were responsible for the phenotypic variation of root  
430 length in tomato under LK stress condition were identified. Combine with  
431 physiological and mapping results of LK stress responses in JZ18 and JZ34 plants  
432 enabled us select several interesting candidate genes controlling the LK tolerance.  
433 These results will provide some instructions for fine mapping and breeding of LK  
434 resistance in the future, and laid the theoretical basis for the mining and screening of  
435 LK resistance tomato resources.

#### 436 **Acknowledgements**

437 This research was supported by the National Key Research and Development  
438 Program of China (2019YFD100030) and the National Natural Science Founding of  
439 China (No.31372054).



## References

- Apse M. P., and E. Blumwald, 2007 Na<sup>+</sup> transport in plants. *Febs Lett.* 581: 2247–2254.  
<https://doi.org/10.1016/j.febslet.2007.04.014>
- Asins M. J., I. Villalta, M. M. Aly, R. Olías, P. Álvarez De Morales, *et al.*, 2013 Two closely linked tomato HKT coding genes are positional candidates for the major tomato QTL involved in Na<sup>+</sup>/K<sup>+</sup> homeostasis. *Plant, Cell Environ.* 36: 1171–1191. <https://doi.org/10.1111/pce.12051>
- Behera S., L. Yu, I. SchmitzTHom, X. Wang, and W. Yi, 2016 Two spatially and temporally distinct Ca<sup>2+</sup> signals convey Arabidopsis thaliana responses to K<sup>+</sup> deficiency. *New Phytol.* 213: 739.  
<https://doi.org/10.1111/nph.14145>
- Cao Y., A. D. M. Glass, and N. M. Crawford, 1993 Ammonium inhibition of Arabidopsis root growth can be reversed by potassium and by auxin resistance mutations *aux1*, *axr1*, and *axr2*. *Plant Physiol.* 102: 983–989.
- Ding Y., W. Luo, and G. Xu, 2010 Characterisation of magnesium nutrition and interaction of magnesium and potassium in rice. *Ann. Appl. Biol.* 149: 111–123.  
<https://doi.org/10.1111/j.1744-7348.2006.00080.x>
- Dong Q., B. Bai, B. O. Almutairi, and J. Kudla, 2021 Emerging roles of the CBL-CIPK calcium signaling network as key regulatory hub in plant nutrition. *J. Plant Physiol.* 257: 153335.  
<https://doi.org/10.1016/j.jplph.2020.153335>
- Du X. Q., F. L. Wang, H. Li, S. Jing, M. Yu, *et al.*, 2019 The transcription factor MYB59 regulates K<sup>+</sup>/NO<sub>3</sub><sup>-</sup> translocation in the arabidopsis response to low K<sup>+</sup> stress. *Plant Cell* 31: 699–714.  
<https://doi.org/10.1105/tpc.18.00674>
- Fageria V. D., 2001 Nutrient interactions in crop plants. *J. Plant Nutr.* 24: 1269–1290.  
<https://doi.org/10.1081/PLN-100106981>
- Fang Y., W. Wu, X. Zhang, H. Jiang, W. Lu, *et al.*, 2015 Identification of quantitative trait loci associated with tolerance to low potassium and related ions concentrations at seedling stage in rice (*Oryza sativa* L.). *Plant Growth Regul.* 77: 157–166.  
<https://doi.org/10.1007/s10725-015-0047-9>
- Gabelman W. H., and B. C. Loughman, 1987 Genetic aspects of plant mineral nutrition. *J. Appl. Ecol.* 28: 745. <https://doi.org/10.1007/978-94-009-2053-8>
- Gai J. Y., and J. K. Wang, 1998 Identification and estimation of a QTL model and its effects. *Theor. Appl. Genet.* 97: 1162–1168. <https://doi.org/10.1007/s001220051005>
- Golldack D., C. Li, H. Mohan, and N. Probst, 2014 Tolerance to drought and salt stress in plants: Unraveling the signaling networks. *Front Plant* 5: 151. <https://doi.org/10.3389/fpls.2014.00151>
- Jung J. Y., R. Shin, and D. P. Schachtman, 2009 Ethylene mediates response and tolerance to potassium deprivation in Arabidopsis. *Plant Cell* 21: 607–621.  
<https://doi.org/10.1105/tpc.108.063099>
- Kocourková D., Z. Krčková, P. Pejchar, K. Kroumanová, T. Podmanická, *et al.*, 2020 Phospholipase Dα1 mediates the high-Mg<sup>2+</sup> stress response partially through regulation of K<sup>+</sup> homeostasis. *Plant Cell Environ.* 43: 2460–2475. <https://doi.org/10.1111/pce.13831>
- Kong F. M., Y. Guo, X. Liang, C. H. Wu, Y. Y. Wang, *et al.*, 2013 Potassium (K) effects and QTL mapping for K efficiency traits at seedling and adult stages in wheat. *Plant Soil* 373: 877–892.  
<https://doi.org/10.1007/s11104-013-1844-4>
- Koyama M. L., A. Levesley, R. M. Koebner, T. J. Flowers, and A. R. Yeo, 2001 Quantitative trait loci

- for component physiological traits determining salt tolerance in rice. *Plant Physiol.* 125: 406–422.  
<https://doi.org/doi:10.1104/pp.125.1.406>
- Li X. T., M. J. Cao, H. Q. Yu, and X. G. Wang, 2011 Genetic analysis of tolerance to low-potassium stress in maize using mixed model of major gene plus polygene. *J. Maize Sci.* 54: 235–241 in Chinese with English abstract. <https://doi.org/10.13597/j.cnki.maize.science.2011.04.033>
- Li H., M. Yu, X. Q. Du, Z. F. Wang, W. H. Wu, *et al.*, 2017 NRT1.5/NPF7.3 functions as a proton-coupled H<sup>+</sup>/K<sup>+</sup> antiporter for K<sup>+</sup> loading into the xylem in arabidopsis. *Plant Cell* 29: 2016–2026. <https://doi.org/10.1105/tpc.16.00972>
- Lin H., M. Zhu, M. Yano, J. Gao, Z. Liang, *et al.*, 2004 QTLs for Na<sup>+</sup> and K<sup>+</sup> uptake of the shoots and roots controlling rice salt tolerance. *Theor. Appl. Genet.* 108: 253–260.  
<https://doi.org/10.1007/s00122-003-1421-y>
- López-Bucio J., A. Cruz-Ramírez, and L. Herrera-Estrella, 2003 The role of nutrient availability in regulating root architecture. *Curr. Opin. Plant Biol.* 6: 280–287.  
[https://doi.org/10.1016/S1369-5266\(03\)00035-9](https://doi.org/10.1016/S1369-5266(03)00035-9)
- Mittler R., 2002 Oxidative stress, antioxidants and stress tolerance. *Trends Plant Sci.* 7: 405–410.  
[https://doi.org/10.1016/S1360-1385\(02\)02312-9](https://doi.org/10.1016/S1360-1385(02)02312-9)
- Mogami J., Y. Fujita, T. Yoshida, Y. Tsukiori, H. Nakagami, *et al.*, 2015 Two distinct families of protein kinases are required for plant growth under high external Mg<sup>2+</sup> concentrations in Arabidopsis. *Plant Physiol.* 167: 1039–1057. <https://doi.org/10.1104/pp.114.249870>
- Pandit A., V. Rai, S. Bal, S. Sinha, V. Kumar, *et al.*, 2010 Combining QTL mapping and transcriptome profiling of bulked RILs for identification of functional polymorphism for salt tolerance genes in rice (*Oryza sativa* L.). *Mol. Genet. Genomics* 284: 121–136.  
<https://doi.org/10.1007/s00438-010-0551-6>
- Pardo J. M., and F. Rubio, 2011 Na<sup>+</sup> and K<sup>+</sup> Transporters in Plant Signaling. Springer Berlin Heidelberg.  
[https://doi.org/10.1007/978-3-642-14369-4\\_3](https://doi.org/10.1007/978-3-642-14369-4_3)
- Qin Y. J., W. H. Wu, and Y. Wang, 2019 ZmHAK5 and ZmHAK1 function in K<sup>+</sup> uptake and distribution in maize under low K<sup>+</sup> conditions. *J. Integr. Plant Biol.* 61: 691–705.  
<https://doi.org/10.1111/jipb.12756>
- R S., and D. P. Schachtman, 2004 Hydrogen peroxide mediates plant root cell response to nutrient deprivation. *Proc. Natl. Acad. Sci.* 101: 8827–8832.  
[https://doi.org/0027-8424\(2004\)101:23<8827:HPMPRC>2.0.TX;2-9](https://doi.org/0027-8424(2004)101:23<8827:HPMPRC>2.0.TX;2-9)
- Rodríguez-Navarro A., 2000 Potassium transport in fungi and plants. *Biochim. Biophys. Acta* 1469: 1–30. [https://doi.org/10.1016/S0304-4157\(99\)00013-1](https://doi.org/10.1016/S0304-4157(99)00013-1)
- Senbayram M., R. Gransee, V. Wahle, and H. Thiel, 2015 Role of magnesium fertilisers in agriculture: plant-soil continuum. *Crop Pasture Sci.* <https://doi.org/10.1071/CP15104>
- Shabala S., and Y. Hariadi, 2005 Effects of magnesium availability on the activity of plasma membrane ion transporters and light-induced responses from broad bean leaf mesophyll. *Planta* 221: 56–65.  
<https://doi.org/http://ecite.utas.edu.au/26477>
- Song W., R. Xue, Y. Song, Y. Bi, Z. Liang, *et al.*, 2018 Differential response of first-order lateral root elongation to low potassium involves nitric oxide in two tobacco cultivars. *J. Plant Growth Regul.* 37: 114–127. <https://doi.org/10.1007/s00344-017-9711-9>
- Tsay Y. F., C. H. Ho, H. Y. Chen, and S. H. Lin, 2011 Integration of nitrogen and potassium signaling. *Annu. Rev. Plant Biol.* 62: 207. <https://doi.org/10.1146/annurev-arplant-042110-103837>
- Very A. A., M. Nieves-Cordones, M. Daly, I. Khan, C. Fizames, *et al.*, 2014 Molecular biology of K<sup>+</sup>

- transport across the plant cell membrane: what do we learn from comparison between plant species? *J. Plant Physiol.* 171: 748–769. <https://doi.org/10.1016/j.jplph.2014.01.011>
- Wang Y., L. He, H. D. Li, J. Xu, and W. H. Wu, 2010 Potassium channel  $\alpha$ -subunit AtKC1 negatively regulates AKT1-mediated  $K^+$  uptake in Arabidopsis roots under low- $K^+$  stress. *Cell Res.* 20: 826–837. <https://doi.org/10.1038/cr.2010.74>
- Wang Y., and W. H. Wu, 2013 Potassium Transport and signaling in higher plants. *Annu. Rev. Plant Biol.* 64: 451–476. <https://doi.org/10.1146/annurev-arplant-050312-120153>
- Wang Y., and W. H. Wu, 2017 Regulation of potassium transport and signaling in plants. *Curr. Opin. Plant Biol.* 39: 123–128. <https://doi.org/10.1016/j.pbi.2017.06.006>
- Wang F. L., Y. L. Tan, L. Wallrad, X. Q. Du, A. Eickelkamp, *et al.*, 2021 A potassium-sensing niche in Arabidopsis roots orchestrates signaling and adaptation responses to maintain nutrient homeostasis. *Dev. Cell* 56: 781-794.e6. <https://doi.org/10.1016/j.devcel.2021.02.027>
- Xu J., H. D. Li, L. Q. Chen, Y. Wang, L. L. Liu, *et al.*, 2006 A protein kinase, interacting with two calcineurin b-like proteins, regulates  $K^+$  transporter AKT1 in Arabidopsis. *Cell* 125: 1347–1360. <https://doi.org/10.1016/j.cell.2006.06.011>
- Yang J. L., X. Y. Xu, and J. F. Li, 2015 Research on screening methods of potassium high efficiency genotypes in tomato seedling stage. *North. Hortic.* 12: 40-42 in Chinese with English abstract. <https://doi.org/10.11937/bfyy.201512012>
- Ye Y., J. Wu, L. Feng, Y. Ju, M. Cai, *et al.*, 2017 Heritability and gene effects for plant architecture traits of crape myrtle using major gene plus polygene inheritance analysis. *Sci. Hortic.* (Amsterdam). 225: 335–342. <https://doi.org/10.1016/j.scienta.2017.06.065>
- Zhao Z., G. Zhang, S. Zhou, Y. Ren, and W. Wang, 2017 The improvement of salt tolerance in transgenic tobacco by overexpression of wheat F-box gene TaFBA1. *Plant Sci.* 259: 71–85. <https://doi.org/10.1016/j.plantsci.2017.03.010>
- Zhao X., Y. Liu, X. Liu, and J. Jiang, 2018 Comparative transcriptome profiling of two tomato genotypes in response to potassium-deficiency stress. *Int. J. Mol. Sci.* 19. <https://doi.org/10.3390/ijms19082402>

**Data availability:** The data underlying this article are available in the article and in its online supplementary material.
